# Supplementary material for: Development of Simple Analytical Method for B-Group Vitamins in Nutritional Products: Enzymatic Digestion and UPLC-MS/MS Quantification
Source: J Anal Methods Chem. 2021 May 5;2021:5526882. doi: 10.1155/2021/5526882 (PMC8116160; doi:10.1155/2021/5526882)
Supplement: Supplementary Materials — Figure S1: chromatograms of B-group vitamins and internal standards in standard solutions by different mobile phase programs. Figure S2: chromatograms of B-group vitamins and internal standards in nutritional products (Supplementary Materials). [file 5526882.f1.docx]

# Journal of Analytical Methods in Chemistry

# Development of Simple Analytical Method for B-Group Vitamins in Nutritional Products: Enzymatic Digestion and UPLC-MS/MS Quantification

Quang Huy Nguyen,1,2 Anh Quoc Hoang,1 Thi My Hanh Truong,1 Thi Diu Dinh,1 Thi Thuy Le,3 Thi Huyen Trang Luu,3 Viet Chien Dinh,3 Thi Minh Thu Nguyen,1 Thi Trang Vu,3* and Thi Anh Huong Nguyen1*

1 Faculty of Chemistry, University of Science, Vietnam National University, Hanoi, 19 Le Thanh Tong, Hanoi 10000, Vietnam.
2 Department of Pharmaceutics and Pharmaceutical Technology, Faculty of Pharmacy, Thai Nguyen University of Medicine and Pharmacy, Thai Nguyen 24000, Vietnam.

3 National Institute for Food Control (NIFC), 65 Pham Than Duat, Hanoi 10000, Vietnam.

Correspondence should be addressed to: Thi Anh Huong Nguyen ([nguyenthianhhuong@hus.edu.vn](mailto:nguyenthianhhuong@hus.edu.vn)) Thi Trang Vu ([trangvt@nifc.gov.vn](mailto:trangvt@nifc.gov.vn))

## Supplementary data

**Fig. S1.** Chromatograms of B-group vitamins and internal standards in standard solutions by different mobile phase programs

**Fig. S2.** Chromatograms of B-group vitamins and internal standards in nutritional products

**Fig. S1.** Chromatograms of B-group vitamins and internal standards in standard solutions by different mobile phase programs

**Isocratic program**

|  |  |
| --- | --- |
|  |  |
|  |  |
|  |  |
|  |  |
|  |  |
|  |  |

**Gradient 1**

|  |  |
| --- | --- |
|  |  |
|  |  |
|  |  |
|  |  |
|  |  |
|  |  |

**Gradient 2**

|  |  |
| --- | --- |
|  |  |
|  |  |
|  |  |
|  |  |
|  |  |
|  |  |

**Gradient 3**

|  |  |
| --- | --- |
|  |  |
|  |  |
|  |  |
|  |  |
|  |  |
|  |  |

**Fig. S2.** Chromatograms of B-group vitamins and internal standards in nutritional products

**Powdered milk**

|  |  |
| --- | --- |
|  |  |
|  |  |
|  |  |
|  |  |
|  |  |
|  |  |

**UHT milk**

|  |  |
| --- | --- |
|  |  |
|  |  |
|  |  |
|  |  |
|  |  |
|  |  |

**Nutritional powder**

|  |  |
| --- | --- |
|  |  |
|  |  |
|  |  |
|  |  |
|  |  |
|  |  |
